# Supplementary material
Source: Research Square preprint supplement (doi:10.21203/rs.3.rs-10445370/v1)
Supplement: Supplementary file 1 [file 142b392e035ccde4f4b37aaf.docx]

**Supplementary Note 1: Database Search strategy**

**PubMed**

("wearable-device*"[TIAB] OR "wearable-electronic-device*"[TIAB] OR "e-skin"[TIAB] OR "electronic-skin"[TIAB] OR "wearabletechnolog*"[TIAB] OR "apple-watch*"[TIAB] OR "fitbit*"[TIAB] OR "biosensing*"[TIAB] OR "bio-sensing*"[TIAB] OR "biosensor*"[TIAB] OR "bio-sensor*"[TIAB] OR "fitnesstracker*"[TIAB] OR "activity-tracker*"[TIAB] OR "smart-glass*"[TIAB] OR "smart-watch*"[TIAB] OR "smartwatch"[TIAB] OR "smartwatches"[TIAB] OR "garmin"[TIAB] OR "galaxy-watch*"[TIAB] OR "wearable-computer*"[TIAB] OR "wearable-sensor*"[TIAB])

AND

("Infectious Diseases"[TIAB] OR "Communicable Diseases"[TIAB] OR "COVID-19"[TIAB] OR "Viral Infection*"[TIAB] OR "Influenza"[TIAB] OR "Sepsis"[TIAB] OR "Tuberculosis"[TIAB] OR "Malaria"[TIAB] OR "HIV"[TIAB] OR "Dengue"[TIAB]OR "Zika"[TIAB] OR "Ebola"[TIAB] OR "Bacterial Infection"[TIAB] OR "Fungal Infection"[TIAB])

AND

("Therapeutics"[MeSH] OR "Treatment"[TIAB] OR "Intervention*"[TIAB] OR "Antibiotic*"[TIAB] OR "Antiviral*"[TIAB] OR "Vaccin*"[TIAB] OR "Drug Therapy"[TIAB] OR "Medication"[TIAB] OR "Remedy"[TIAB] OR "Clinical Trial*"[TIAB] OR "Efficacy"[TIAB] OR "Safety"[TIAB])

NOT

(Review[pt] OR "Systematic Review"[pt] OR "Meta-Analysis"[pt])

**Embase**

('wearable electronic device'/exp OR 'biosensor'/exp OR 'telemetric monitoring'/exp)

AND

('communicable disease'/exp OR 'virus infection'/exp OR 'bacterial infection'/exp OR 'fungal infection'/exp)

AND

('drug therapy'/exp OR 'vaccine'/exp OR 'drug safety'/exp OR 'clinical trial'/exp)
